# Supplementary material
Source: publisher figshare collection journal article supplement (https://future-science-group.figshare.com/ndownloader/files/31811414)
Supplement: Supplementary file 1 [file 31811414]

| Gene | logFC | AveExpr | P.Value | adj.P.Val | probe_id |
| --- | --- | --- | --- | --- | --- |
| OAS2 | -0.74727 | 8.529436 | 3.04E-08 | 0.000104 | 206553_at |
| IFI44L | -0.79793 | 12.13762 | 1.29E-06 | 0.000899 | 204439_at |
| IFIT3 | -0.38447 | 12.66549 | 5.00E-06 | 0.00244 | 229450_at |
| RSAD2 | -0.89639 | 11.81538 | 5.70E-06 | 0.002685 | 242625_at |
| IFI44 | -0.56724 | 12.19145 | 1.07E-05 | 0.004287 | 214059_at |
| IFIT1 | -0.69678 | 12.12377 | 2.32E-05 | 0.007546 | 203153_at |
| PLSCR1 | -0.29794 | 11.98114 | 0.000298 | 0.047149 | 202446_s_at |

Supplementary Table 4 Analysis of key genes expressions in GSE185047
